# Supplementary material
Source: publisher figshare collection journal article supplement (https://sage.figshare.com/ndownloader/files/13001885)
Supplement: Supplementary file 1 [file 13001885]

Appendix 1 – Search Strategy

**PubMed**

("Physician-Patient Relations"[Mesh] OR "professional-patient relations"[mesh] OR "hospital-patient relations"[mesh] OR "professional-family relations"[mesh] OR "nurse-patient relations"[mesh] OR "Physician Patient Relations"[tw] OR "professional patient relations"[tw] OR "hospital patient relations"[tw] OR "professional family relations"[tw] OR "nurse patient relations"[tw] OR ((doctor*[tw] OR "patients"[tw] OR "patient"[tw] OR physician*[tw] OR provider*[tw] OR nurse*[tw] OR staff*[tw] OR "professional"[tw] OR "professionals"[tw] OR personnel*[tw]) AND ("relation"[tw] OR "relations"[tw] OR "relationship"[tw] OR "relationships"[tw] OR "communication"[tw] OR "communicating"[tw] OR "communicated"[tw]))) AND ("Communication"[Mesh] OR communicat*[tw]) AND ("Inpatients"[Mesh] OR inpatient*[tw] OR "hospital"[tw] OR "hospitals"[tw] OR hospitali*[tw]) AND ("hearing loss"[mesh] OR "hearing loss, noise-induced"[mesh] OR "hearing disorders"[mesh] OR "hearing loss"[tw] OR "hearing losses"[tw] OR "loss of hearing"[tw] OR "hearing disorder"[tw] OR "hearing disorders"[tw] OR "persons with hearing impairments"[mesh] OR "hearing impairment"[tw] OR "hearing impairments"[tw] OR "hearing impaired"[tw] OR "correction of hearing impairment"[mesh] OR "presbycusis"[Mesh] OR "presbycusis"[tw] OR "presbycuses"[tw] OR "presbyacusis"[tw] OR "presbyacuses"[tw] OR "presbyacusia"[tw] OR "auditory defect"[tw] OR "auditory defects"[tw] OR "auditory deficit"[tw] OR "auditory deficits"[tw] OR "auditory threshold"[mesh] OR "auditory threshold"[tw] OR "auditory thresholds"[tw] OR "impaired hearing"[tw] OR "hearing deficit"[tw] OR "hearing deficits"[tw] OR "hearing disorder"[tw] OR "hearing disorders"[tw] OR "hearing dysfunction"[tw] OR "hearing dysfunctions"[tw] OR "auditory acuity"[tw] OR audiolog*[tw] OR "auditory"[tw])

**Embase**

('doctor patient relation'/exp OR 'human relation'/de OR 'nurse patient relationship'/exp OR 'Physician Patient Relations':ti,ab,de OR 'professional patient relations':ti,ab,de OR 'hospital patient relations':ti,ab,de OR 'professional family relations':ti,ab,de OR 'nurse patient relations':ti,ab,de OR ((doctor*:ti,ab,de OR 'patients':ti,ab,de OR 'patient':ti,ab,de OR physician*:ti,ab,de OR provider*:ti,ab,de OR nurse*:ti,ab,de OR staff*:ti,ab,de OR 'professional':ti,ab,de OR 'professionals':ti,ab,de) AND ('relation':ti,ab,de OR 'relations':ti,ab,de OR 'relationship':ti,ab,de OR 'relationships':ti,ab,de OR 'communication':ti,ab,de OR 'communicating':ti,ab,de OR 'communicated':ti,ab,de))) AND ('interpersonal communication'/exp OR communicat*:ti,ab,de) AND ('hospital patient'/exp OR inpatient*:ti,ab,de OR 'hospital':ti,ab,de OR 'hospitals':ti,ab,de OR hospitali*:ti,ab,de) AND ('hearing impairment'/de or 'hearing disorder'/exp  or 'hearing loss':ti,ab or 'hearing losses':ti,ab or 'loss of hearing':ti,ab or 'hearing disorder':ti,ab or 'hearing disorders':ti,ab or 'hearing impairment':ti,ab or 'hearing impairments':ti,ab or 'hearing impaired':ti,ab or 'rehabilitation of hearing impaired':ti,ab or 'presbyacusis'/exp or 'presbycusis':ti,ab or 'presbyacusis':ti,ab or 'presbyacuses':ti,ab or 'presbyacusia':ti,ab or 'auditory defect':ti,ab or 'auditory defects':ti,ab or 'auditory deficit':ti,ab or 'auditory deficits':ti,ab or 'auditory threshold'/de or 'auditory threshold':ti,ab or 'auditory thresholds':ti,ab or 'impaired hearing':ti,ab or 'hearing deficit':ti,ab or 'hearing deficits':ti,ab or 'hearing disorder':ti,ab or 'hearing disorders':ti,ab or 'hearing dysfunction':ti,ab or 'hearing dysfunctions':ti,ab OR 'auditory acuity':ti,ab OR audiolog*:ti,ab,de OR 'auditory':ti,ab,de)

**Cochrane**

([mh "Physician-Patient Relations"] OR [mh "professional-patient relations"] OR [mh "hospital-patient relations"] OR [mh "professional-family relations"] OR [mh "nurse-patient relations"] OR "Physician Patient Relations":ti,ab,kw OR "professional patient relations":ti,ab,kw OR "hospital patient relations":ti,ab,kw OR "professional family relations":ti,ab,kw OR "nurse patient relations":ti,ab,kw OR ((doctor*:ti,ab,kw OR "patients":ti,ab,kw OR "patient":ti,ab,kw OR physician*:ti,ab,kw OR provider*:ti,ab,kw OR nurse*:ti,ab,kw OR staff*:ti,ab,kw OR "professional":ti,ab,kw OR "professionals":ti,ab,kw) AND ("relation":ti,ab,kw OR "relations":ti,ab,kw OR "relationship":ti,ab,kw OR "relationships":ti,ab,kw OR "communication":ti,ab,kw OR "communicating":ti,ab,kw OR "communicated":ti,ab,kw))) AND ([mh "Communication"] OR communicat*:ti,ab,kw) AND ([mh "Inpatients"] OR inpatient*:ti,ab,kw OR "hospital":ti,ab,kw OR "hospitals":ti,ab,kw OR hospitali*:ti,ab,kw) AND ([mh "hearing loss"] OR [mh "hearing loss, noise-induced"] OR [mh "hearing disorders"]  OR "hearing loss":ti,ab,kw OR "hearing losses":ti,ab,kw OR "loss of hearing":ti,ab,kw OR "hearing disorder":ti,ab,kw OR "hearing disorders":ti,ab,kw OR [mh "persons with hearing impairments"] OR "hearing impairment":ti,ab,kw OR "hearing impairments":ti,ab,kw OR "hearing impaired":ti,ab,kw OR [mh "correction of hearing impairment"] OR [mh "presbycusis"] OR "presbycusis":ti,ab,kw OR "presbycuses":ti,ab,kw OR "presbyacusis":ti,ab,kw OR "presbyacuses":ti,ab,kw OR "presbyacusia":ti,ab,kw OR "auditory defect":ti,ab,kw OR "auditory defects":ti,ab,kw OR "auditory deficit":ti,ab,kw OR "auditory deficits":ti,ab,kw OR [mh "auditory threshold"] OR "auditory threshold":ti,ab,kw OR "auditory thresholds":ti,ab,kw OR "impaired hearing":ti,ab,kw OR "hearing deficit":ti,ab,kw OR "hearing deficits":ti,ab,kw OR "hearing disorder":ti,ab,kw OR "hearing disorders":ti,ab,kw OR "hearing dysfunction":ti,ab,kw OR "hearing dysfunctions":ti,ab,kw OR "auditory acuity":ti,ab,kw OR audiolog*:ti,ab,kw OR "auditory":ti,ab,kw)

**PsycINFO**

("Physician Patient Relations" OR "professional patient relations" OR "hospital patient relations" OR "professional family relations" OR "nurse patient relations" OR ((doctor* OR "patients" OR "patient" OR physician* OR provider* OR nurse* OR staff* OR "professional" OR "professionals") AND ("relation" OR "relations" OR "relationship" OR "relationships" OR "communication" OR "communicating" OR "communicated"))) AND (DE "Communication" OR communicat*) AND (inpatient* OR "hospital" OR "hospitals" OR hospitali*) AND (DE "hearing disorders"  OR "hearing loss" OR "hearing losses" OR "loss of hearing" OR "hearing disorder" OR "hearing disorders" OR "persons with hearing impairments" OR "hearing impairment" OR "hearing impairments" OR "hearing impaired" OR OR "presbycusis" OR "presbycuses" OR "presbyacusis" OR "presbyacuses" OR "presbyacusia" OR "auditory defect" OR "auditory defects" OR "auditory deficit" OR "auditory deficits" OR DE "auditory acuity" OR "auditory threshold" OR "auditory thresholds" OR "impaired hearing" OR "hearing deficit" OR "hearing deficits" OR "hearing disorder" OR "hearing disorders" OR "hearing dysfunction" OR "hearing dysfunctions" OR "auditory acuity" OR audiolog* OR "auditory")

**CINAHL**

(MH "Physician-Patient Relations" OR MH "professional-patient relations" OR MH "guest relations" OR MH "professional-family relations" OR MH "nurse-patient relations" OR "Physician Patient Relations" OR "professional patient relations" OR "hospital patient relations" OR "professional family relations" OR "nurse patient relations" OR ((doctor* OR "patients" OR "patient" OR physician* OR provider* OR nurse* OR staff* OR "professional" OR "professionals") AND ("relation" OR "relations" OR "relationship" OR "relationships" OR "communication" OR "communicating" OR "communicated"))) AND (MH "Communication" OR communicat*) AND (MH "Inpatients" OR inpatient* OR "hospital" OR "hospitals" OR hospitali*) AND (MH "hearing loss, noise-induced" OR MH "hearing disorders+"  OR "hearing loss" OR "hearing losses" OR "loss of hearing" OR "hearing disorder" OR "hearing disorders" OR "persons with hearing impairments" OR "hearing impairment" OR "hearing impairments" OR "hearing impaired" OR MH "presbycusis" OR "presbycusis" OR "presbycuses" OR "presbyacusis" OR "presbyacuses" OR "presbyacusia" OR "auditory defect" OR "auditory defects" OR "auditory deficit" OR "auditory deficits" OR MH "auditory threshold" OR "auditory threshold" OR "auditory thresholds" OR "impaired hearing" OR "hearing deficit" OR "hearing deficits" OR "hearing disorder" OR "hearing disorders" OR "hearing dysfunction" OR "hearing dysfunctions" OR "auditory acuity" OR audiolog* OR "auditory")
